# Supplementary material
Source: Elsevier journal article supplement (https://www.sciencedirect.com/science/article/pii/S1575181321001194)
Supplement: mmc1 [file S1575181321001194:mmc1.pdf]

## **ANEXO III: Modelo de consentimiento informado**

### **CONSENTIMIENTO POR ESCRITO DEL PACIENTE O PARTICIPANTE**

**Título del estudio:** Análisis descriptivo del grado de adquisición de competencias en soporte vital básico en estudiantes de tercero de grado de medicina.

Yo, (nombre y apellidos) .....,  
con D.N.I. nº....., he hablado con el profesional responsable, el Profesor  
[REDACTED] con DNI: [REDACTED], quien me ha informado acerca del estudio  
que se va a llevar a cabo.

- He leído la hoja de información que se me ha entregado.
- He podido hacer preguntas sobre el estudio.
- He recibido suficiente información sobre el estudio.
- Comprendo que mi participación es voluntaria.
- Comprendo que puedo retirarme del estudio:
  1. Cuando quiera.
  2. Sin tener que dar explicaciones.
  3. Sin que esto repercuta en el resto de mis actividades.

**Presto libremente mi conformidad para participar en el estudio.**

**Los resultados obtenidos en este estudio sólo serán utilizados para los fines específicos del mismo.**

**Fecha**

**Firma del paciente o participante**

**Fecha**

**Firma del profesional responsable del estudio y D.N.I.**

Para resolver cualquier duda contactar a través de correo electrónico:

[REDACTED]

## **HOJA DE INFORMACIÓN AL PARTICIPANTE**

Análisis descriptivo del grado de adquisición de competencias en soporte vital básico en estudiantes de tercero de grado de medicina.

El **objetivo principal** es analizar el grado de adquisición de las competencias en soporte vital básico con la modalidad formativa de blended learning, en estudiantes de tercero de Grado de Medicina de la Universidad de Granada

Los **objetivos secundarios** son:

1. Analizar las causas que condicionan las diferencias en el grado de adquisición de las principales competencias.
2. Estudiar y comparar el grado de adquisición de cada competencia que forma parte del algoritmo de SVB.
3. Analizar si existen diferencias en el grado de aprendizaje según el sexo de cada estudiante.
4. Estudiar las causas que pueden condicionar dichas diferencias, si las hubiera.

### **Metodología:**

Se trata de un **estudio descriptivo longitudinal** (con seguimiento), que presenta como población de estudio a los alumnos de tercer curso de Grado de Medicina de la Universidad de Granada. Para el análisis se emplearán los datos obtenidos en una evaluación inicial en la Facultad de Medicina y los datos de una reevaluación (la Evaluación Clínica Objetiva y Estructurada o ECOE) a la misma muestra de alumnos.

Los **beneficios y/o resultados esperados** derivaran de una mejora en el proceso de enseñanza / aprendizaje en soporte vital básico para los alumnos del grado de medicina de forma que, si los resultados de este estudio fueran favorables, podría plantearse un estudio multicéntrico donde participaran todas las facultades de medicina de la Comunidad Autónoma Andaluza.

En este estudio **no será necesario la obtención de muestras biológicas**.

La **participación es voluntaria** y el participante tendrá la posibilidad de revocar su consentimiento, en cualquier momento, y sin necesidad de tener que dar explicaciones.

### **Confidencialidad y protección de datos:**

*De acuerdo a la Ley Orgánica 3/2018 de Protección de Datos Personales y garantía de los derechos digitales, los datos personales que se le requieren (p.ej.edad, sexo, datos de salud) son los necesarios para cubrir los objetivos del estudio. En ninguno de los informes del estudio aparecerá su nombre, y su identidad no será revelada a persona alguna salvo para cumplir con los fines del estudio, y en el caso de urgencia médica o requerimiento*

*legal. Cualquier información de carácter personal que pueda ser identificable será conservada y procesada por medios informáticos en condiciones de seguridad.*

*El acceso a dicha información quedará restringido al personal autorizado que estará obligado a mantener la confidencialidad de la información. Los resultados del estudio podrán ser comunicados a las autoridades sanitarias y, eventualmente, a la comunidad científica a través de congresos y/o publicaciones.*

*Los datos serán utilizados para los fines específicos de este estudio y en todo caso si fuese necesario podrán ser también utilizados con otros fines de tipo docente o carácter científico. De acuerdo con la ley vigente, tiene usted derecho al acceso de sus datos personales; asimismo, y si está justificado, tiene derecho a su rectificación y cancelación. Si así lo desea, deberá solicitarlo al médico que le atiende en este estudio.*

**Respecto a la información obtenida del proyecto que se necesite o se desee utilizar en el futuro, el participante será informado y dará su consentimiento para ello.**
