# Supplementary material
Source: Elsevier journal article supplement (https://www.sciencedirect.com/science/article/pii/S1575181321001194)
Supplement: mmc2 [file S1575181321001194:mmc2.pdf]

# FACULTAD DE MEDICINA

SVB para alumnos de Tercero de Grado de Medicina. ECOE

REALIZACIÓN: Facultad de Medicina UGR.

EVALUADOR:

FECHA: Curso Académico 2019 / 2020. Primer Cuatrimestre.

NOMBRE Y APELLIDOS  
DEL ALUMNO:

## PARAMETROS PARA LA EVALUACIÓN

|                                                                                                    | SI (X) | NO (X) |
|----------------------------------------------------------------------------------------------------|--------|--------|
| 1. ¿COMPRUEBA EL NIVEL DE CONCIENCIA?                                                              |        |        |
| 2. ¿REALIZA LA APERTURA DE LA VÍA AÉREA?                                                           |        |        |
| 3. ¿COMPRUEBA LA RESPIRACIÓN MEDIANTE LA MANIOBRA VER/OIR/SENTIR MANTENIENDO ABIERTA LA VÍA AÉREA? |        |        |
| 4. ¿SOLICITA AYUDA?, ¿ACTIVA EL SISTEMA DE EMERGENCIAS?                                            |        |        |
| 5. ¿SOLICITA EL DEA?                                                                               |        |        |
| 6. ¿LOCALIZA DE FORMA ADECUADA EL LUGAR PARA LA REALIZACION DEL MASAJE CARDÍACO?                   |        |        |
| 7. ¿INICIA MASAJE CARDÍACO CONTINUO Y DE CALIDAD?                                                  |        |        |
| 8. ¿PROCEDE A REABRIR LA VÍA AÉREA Y A REALIZAR DOS INSUFLACIONES CON LA TÉCNICA ADECUADA?         |        |        |
| 9. ¿SINCRONIZA VENTILACIÓN / COMPRESIÓN 30/2?                                                      |        |        |
| 10. ¿SIGUE LAS INDICACIONES DEL DEA CUANDO DESTÉ DISPONIBLE?                                       |        |        |
